RESEARCH ARTICLE

# A novel risk score model for predicting mortality in heart failure with preserved ejection fraction: Insights from the CURE-HF Registry–ApHAC score

Takenori Aoki<sup>1</sup>, Sho Suzuki<sup>1</sup>\*, Masatoshi Minamisawa, Koji Yoshie, Ken Nishikawa, Yukari Okuma, Kazuhiro Kimura, Yasushi Ueki<sup>1</sup>, Yasutaka Oguchi, Tamon Kato, Tatsuya Saigusa<sup>1</sup>, Soichiro Ebisawa<sup>1</sup>, Ayako Okada, Hirohiko Motoki, Koichiro Kuwahara<sup>1</sup>

Department of Cardiovascular Medicine, Shinshu University School of Medicine, Matsumoto, Japan

\* These authors contributed equally to this work.

\* [jersey0042@gmail.com](mailto:jersey0042@gmail.com)

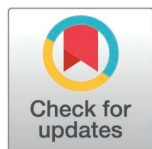

**OPEN ACCESS**

**Citation:** Aoki T, Suzuki S, Minamisawa M, Yoshie K, Nishikawa K, Okuma Y, et al. (2025) A novel risk score model for predicting mortality in heart failure with preserved ejection fraction: Insights from the CURE-HF Registry–ApHAC score. PLoS One 20(9): e0332913. <https://doi.org/10.1371/journal.pone.0332913>

**Editor:** Amirmohammad Khalaji, Tehran University of Medical Sciences, IRAN, ISLAMIC REPUBLIC OF

**Received:** March 31, 2025

**Accepted:** September 6, 2025

**Published:** September 23, 2025

**Copyright:** © 2025 Aoki et al. This is an open access article distributed under the terms of the [Creative Commons Attribution License](https://creativecommons.org/licenses/by/4.0/), which permits unrestricted use, distribution, and reproduction in any medium, provided the original author and source are credited.

**Data availability statement:** All relevant data are within the manuscript and its [Supporting Information](#) files.

**Funding:** The author(s) received no specific funding for this work.

## Abstract

### Aims

To create a simple risk score model to predict post-discharge mortality in patients with heart failure with preserved ejection fraction (HFpEF) after treatment for acute decompensated heart failure (HF).

### Methods and results

This was a post-hoc analysis from the CURE-HF registry, which was a prospective multi-center cohort study conducted in Japan between July 2014 and March 2019. We included 378 consecutive patients with HFpEF (left ventricular ejection fraction  $\geq 50\%$ ) who were followed for two years. The total cohort was randomly divided into two cohorts: the derivation (n=278) and the validation (n=100) cohort. The primary endpoint was all-cause mortality within two years. Logistic regression models were used to evaluate the associations between covariates and the primary endpoint, and to produce the risk score model. C-statistics were calculated to assess the discriminative ability of the derived model. The median age was 83 years, and 52% of the patients were female. In total, 97 patients died within two years. No significant differences were observed between the derivation and validation cohorts in baseline characteristics. On multivariable logistic regression analysis with backward stepwise variable selection, the following variables were selected as the components of the risk score model: age, prior HF admission, serum albumin, and creatinine. The model enabled stratification of mortality rates across thirds, and the average predicted versus observed probabilities of death for the low-, intermediate-, and high-risk groups were 8% vs. 9%, 23% vs. 21%, and 46% vs. 49%, respectively. The c-statistic of the

**Competing interests:** Dr. Suzuki has received lecture fees from Abbott Medical Japan LLC, Abiomed Japan K.K., Daiichi Sankyo Co., Ltd., Heart Organization Co., Ltd., NIPRO CORPORATION, and Otsuka Pharmaceutical Co., Ltd.; manuscript fees from Nankodo Co., Ltd., NIPPONRINSHOSHA Co., Ltd., and YODOSHA Co., Ltd.; research grants from AIBA WORKS Co., Ltd., Fukuda Foundation for Medical Technology, and Shinshu Public Utility Foundation for Promotion of Medical Sciences. Dr. Minamisawa has received consulting fees from Alexion Pharma GK; payment or honoraria for lectures from Pfizer Japan Inc., Nippon Boehringer Ingelheim Co. Ltd., Sanofi K.K., AstraZeneca K.K., Toa Eiyo Ltd., Bayer Yakuhin Ltd., Takeda Pharmaceutical Company Limited, Sumitomo Pharma Co. Ltd., Janssen Pharmaceutical, Otsuka Pharmaceutical, Kowa Company Limited, Novartis Pharma., Daiichi Sankyo Company Limited., Novo Nordisk Pharma Ltd., and Anlylam Japan; and is a member of the Advisory Board for Pfizer Japan Inc. and Alexion Pharma GK. Dr. Kuwahara has received lecture fees from Astellas Pharma Inc., AstraZeneca K.K., MSD K.K., Otsuka Pharmaceutical Co., Ltd., Ono Pharmaceutical Co., Ltd., Kyowa Kirin Co., Ltd., Kowa Co., Ltd., Sanofi K.K., Sumitomo Dainippon Pharma Co., Ltd. (Sumitomo Pharma Co., Ltd.), Mitsubishi Tanabe Pharma Corp., Eli Lilly Japan K.K., Nippon Boehringer Ingelheim Co., Ltd., Novartis Pharma K.K., Novo Nordisk Pharma Ltd., Bayer Yakuhin, Ltd., Pfizer Japan Inc., and Janssen Pharmaceutical K.K.; funded research or joint research expenses from Kowa Co., Ltd., AstraZeneca K.K., Daiichi Sankyo Co., Ltd., Novo Nordisk Pharma Ltd., Amgen, Janssen Pharmaceutical K.K., Parexel International Inc., and Astellas Pharma Inc. His affiliated institution (Shinshu University School of Medicine) has received grants from Otsuka Pharmaceutical Co., Ltd., Mitsubishi Tanabe Pharma Corp., Nippon Boehringer Ingelheim Co., Ltd., and Kyowa Kirin Co., Ltd., and his department has endowed chairs from Medtronic Japan Co. Ltd., Boston Scientific Japan K.K., Abbott Japan LLC, Japan Lifeline Co.,Ltd., Biotronik Japan, Terumo Corporation, Nipro Corporation, and Cordis Japan G.K. Medtronic Japan Co. Ltd., Boston Scientific Japan K.K., Abbott Japan LLC, Japan Lifeline Co.,Ltd., Biotronik Japan, Terumo Corporation, Nipro Corporation, and Cordis Japan G.K. Other authors have reported that they have no relationships relevant to the contents of this paper to disclose.

derived model in the validation cohorts was 0.764, indicating a good discrimination of the primary endpoint.

## Conclusions

We developed a simple risk score model for predicting two-year mortality in patients with HFpEF. This score model may be useful in guiding decisions regarding close follow-up, advanced therapies, or palliative care for these patients.

## Introduction

Heart failure with preserved ejection fraction (HFpEF) is a heterogeneous condition arising from various factors such as hypertension, atrial fibrillation (AF), obesity, and extracardiac comorbidities, and is particularly common in the elderly [1–3]. Owing to the aging of the global population and increased prevalence of coexisting conditions, the number of patients with HFpEF will continue to increase annually. The survival rate of patients hospitalized for HF remains unsatisfactory [4–6], and predicting the prognosis after discharge is crucial for selecting appropriate treatment strategies.

Many risk scores have been developed to assess the risk of adverse events in patients with HF [7–10]. However, it has been reported that prognostic factors differ between heart failure with reduced ejection fraction (HFrEF) and HFpEF, and prognostic prediction models that include patients with HFrEF have limited performance in predicting the prognosis of HFpEF [11,12]. Because HFpEF represents a heterogeneous population and established biomarkers are still lacking, prognostic prediction remains challenging [13]. Recently, a novel risk score for HFpEF was reported [14], which was developed using data from the Dapagliflozin Evaluation to Improve the Lives of Patients With Preserved Ejection Fraction Heart Failure (DELIVER) trial [15], the Angiotensin Receptor Nephilysin Inhibition in Heart Failure With Preserved Ejection Fraction (PARAGON-HF) trial [16], and the Irbesartan in Heart Failure With Preserved Ejection Fraction Study (I-PRESERVE) trial [17]. However, the study was based on data from patients with chronic heart failure with a left ventricular ejection fraction (LVEF) of 40% or higher [14]. Furthermore, the clinical characteristics of patients with HFpEF in Japan differ from those in Western countries: while HFpEF patients in Western countries are often younger and obese, those in Japan tend to be older and lean, highlighting the importance of accumulating data from Asia [13]. A risk score model that accurately predicts the prognosis of patients with HFpEF would be useful for bedside determination.

Given this background, our objective was to create a simple risk score model to predict post-discharge mortality in Japanese patients with HFpEF after treatment for acute decompensated HF (ADHF).

## Methods

### Study design

This was a post-hoc analysis from the Clue of Risk Stratification in Elderly Patients with Heart Failure (CURE-HF) registry, which was a prospective multi-center cohort

study conducted in Nagano Prefecture, Japan. The CURE-HF registry contains data of 1036 consecutive patients who were hospitalized with a primary diagnosis of ADHF and thereafter discharged after treatment at 15 institutions between July 2014 and March 2019 [18]. Patients aged <20 years, and those with acute coronary syndrome were excluded. In this study, we additionally excluded 518 patients with LVEF <50%, 95 patients with severe valvular heart disease, 25 patients without a two-year follow-up, and 20 patients with unavailable data. Data from the remaining 378 consecutive patients with HFpEF were included in our study (Fig 1). The study was approved by the review board and ethics committee of each participating institution (approval number: 2710). All participants provided written informed consent prior to enrollment. The study was conducted in accordance with the principles of the Declaration of Helsinki and was registered with the University Hospital Medical Information Network (UMIN 000024470).

### Measurements and data collection

Following admission, medical treatment was initiated at the investigator’s discretion. Baseline clinical data, including demographics, medical history, laboratory data, electrocardiograms, and echocardiographic data, were assessed during the compensated state of HF. Follow-up data were acquired from hospital charts and direct contact with patients or their referring physicians. For a thorough assessment of clinical events, additional information was sourced from visits or telephone contact with surviving patients or family members as well as medical records from other hospitals, when necessary, between June 2021 and August 2021. These events were fully anonymized before the analysis by investigators who were blinded to the participants’ identities. Data were accessed on 24/07/2024. The primary endpoint of the study was all-cause death within two years.

### Definitions

Previous hospitalization for HF was determined based on a history of HF diagnosed according to the Framingham criteria [19] and a record of hospitalization for HF. HF was classified according to baseline LVEF in the compensated state before discharge as preserved LVEF (LVEF  $\geq$ 50%). Cardiac death was defined as death due to HF, death from other cardiac causes, or sudden cardiac death [20]. Hypertension was defined as a systolic blood pressure  $\geq$ 140 mmHg, diastolic blood pressure  $\geq$ 90 mmHg, or ongoing therapy for hypertension. Diabetes mellitus was defined as HbA1c  $\geq$ 6.5%, fasting

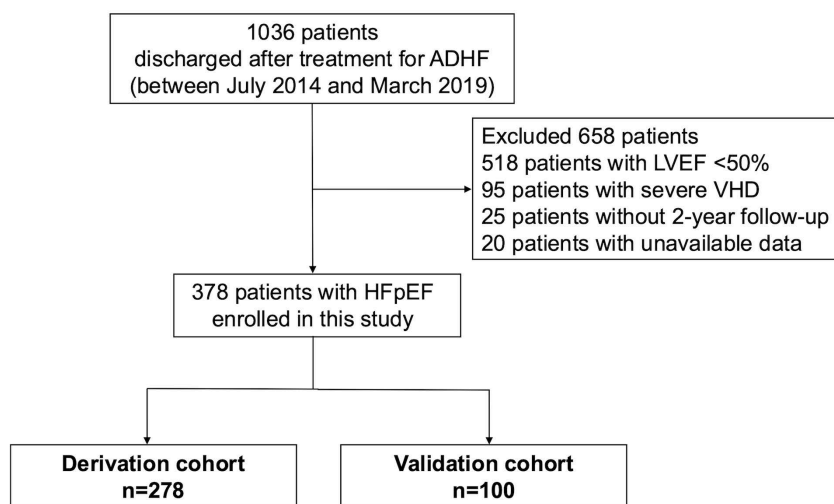

**Fig 1. Patient flow chart.** ADHF, acute decompensated heart failure; HFpEF, heart failure with preserved ejection fraction; LVEF, left ventricular ejection fraction; VHD, valvular heart disease.

<https://doi.org/10.1371/journal.pone.0332913.g001>

glucose  $\geq 126$  mg/dL, random plasma glucose  $\geq 200$  mg/dL, or a clinical history of oral hypoglycemic agent and/or insulin use. LVEF was determined by echocardiography using the modified Simpson's method.

### Statistical analysis

Continuous variables were summarized as mean  $\pm$  standard deviation if they were normally distributed and as median with interquartile range if they were not normally distributed. Normality was assessed using the Shapiro-Wilk W-test. Baseline characteristics were compared using contingency tables and the  $\chi^2$  test for categorical variables, the t-test for normally distributed continuous variables, or the Mann-Whitney U test for non-normally distributed continuous variables. The total cohort was randomly divided into two groups using the `sample()` function in R software: the derivation ( $n=278$ ) and the validation ( $n=100$ ) cohort ([Fig 1](#)). Associations between covariates and the primary endpoint were evaluated using univariable and multivariable logistic regression models with odds ratio (OR)s and 95% confidence interval (CI)s. The following variables, which are clinically considered to be associated with prognosis in HFpEF, were selected as candidates: age, New York Heart Association (NYHA) class, prior HF admission, hemoglobin levels, serum albumin levels, serum creatinine levels, brain natriuretic peptide (BNP) levels, and the presence of atrial fibrillation (AF). A multivariable logistic regression analysis with backward stepwise variable selection was performed to generate the prediction model. Missing data were addressed using multiple imputation by chained equations. Variables selected as components of the prediction model were included in the imputation model. Ten imputed datasets were generated using logistic regression for binary variables and predictive mean matching for continuous variables [21]. Multiple imputation with 10 datasets was considered sufficient given the low missing rate of 2.3% [22,23]. Pooled estimates were calculated according to Rubin's rules. The Hosmer–Lemeshow test was used to assess the compatibility of the multivariable logistic regression model. C-statistics were calculated to assess the discriminative ability of the derived model. The calibration performance of the model was assessed by comparing the predicted and observed probabilities for the three groups according to the tertile of the risk score. The model was then validated using the validation cohort by assessing its performance, discrimination, and calibration. All tests were 2-sided, and a p-value  $<0.05$  was considered statistically significant. Statistical analyses were performed using SPSS Statistics for Windows version 29 (IBM Corp., Armonk, NY, USA) or R software, version 4.3.1 (R Foundation for Statistical Computing, Vienna, Austria).

## Results

### Patient characteristics

The baseline characteristics of the entire cohort are presented in [Table 1](#). The median age was 83 (interquartile range [IQR], 77–88) years, and 52% ( $n=195$ ) of the patients were female. The median LVEF was 62 (IQR, 56–68) %. In total, 97 (26%) patients died (cardiac death, 53; non-cardiac death, 44) within two years. No significant differences were observed between the derivation and validation cohorts. Comparisons between patients who died and those who survived in the derivation and validation cohorts are shown in [S1](#) and [S2 Table](#), respectively. In the derivation cohort, patients who died within two years were older and had lower body mass index (BMI), hemoglobin, and serum albumin levels, higher BNP and serum creatinine levels, and smaller left ventricular sizes. The proportion of patients with prior HF admission and NYHA class III or IV was higher in patients who died than in those who did not.

### Constructing a score model to predict two-year mortality

The results of univariable logistic regression analysis of the primary endpoint in the derivation cohort are shown in [Table 2](#). The following variables were associated with the primary outcome: age (OR, 1.088; 95% CI, 1.045–1.132;  $p<0.001$ ), BMI (OR, 0.911; 95% CI, 0.852–0.975;  $p=0.007$ ), NYHA class (OR, 2.662; 95% CI, 1.392–5.093;  $p=0.003$ ), prior HF admission (OR, 2.198; 95% CI, 1.228–3.934;  $p=0.008$ ), hemoglobin levels (OR, 0.771; 95% CI, 0.663–0.897;  $p<0.001$ ), serum

**Table 1. Baseline characteristics of patients with heart failure with preserved ejection fraction in the derivation and validation cohorts.**

| Variable                          | All patients (n=378) | Derivation (n=278) | Validation (n=100) | p-value |
|-----------------------------------|----------------------|--------------------|--------------------|---------|
| Age (years)                       | 83 [77–88]           | 83 [77–87]         | 84 [77–89]         | 0.564   |
| Female, n (%)                     | 195 (52)             | 138 (50)           | 57 (57)            | 0.207   |
| BMI (kg/m <sup>2</sup> )          | 21.0 [19.0–24.2]     | 21.0 [19.0–24.1]   | 21.2 [19.0–24.8]   | 0.886   |
| Systolic blood pressure (mmHg)    | 117 [104–129]        | 117 [105–128]      | 116 [102–130]      | 0.659   |
| Diastolic blood pressure (mmHg)   | 65 [56–73]           | 64 [57–73]         | 65 [55–75]         | 0.817   |
| NYHA Class III or IV, n (%)       | 66 (18)              | 48 (17)            | 18 (18)            | 0.868   |
| Prior HF admission, n (%)         | 99 (26)              | 70 (25)            | 29 (29)            | 0.468   |
| Hypertension, n (%)               | 281 (74)             | 201 (72)           | 80 (80)            | 0.131   |
| Diabetes mellitus, n (%)          | 112 (30)             | 77 (28)            | 35 (35)            | 0.170   |
| Atrial fibrillation, n (%)        | 248 (66)             | 185 (67)           | 63 (63)            | 0.466   |
| <b>Medication</b>                 |                      |                    |                    |         |
| RAS inhibitors, n (%)             | 254 (67)             | 185 (67)           | 69 (69)            | 0.654   |
| SGLT2 inhibitors, n (%)           | 15 (4)               | 13 (5)             | 2 (2)              | 0.240   |
| Beta-blockers, n (%)              | 239 (63)             | 177 (64)           | 62 (62)            | 0.767   |
| MRAs, n (%)                       | 182 (48)             | 135 (49)           | 47 (47)            | 0.789   |
| Loop diuretics, n (%)             | 313 (83)             | 229 (82)           | 84 (84)            | 0.712   |
| <b>Laboratory data</b>            |                      |                    |                    |         |
| BNP (pg/mL)                       | 193 [90–377]         | 195 [94–379]       | 173 [81–363]       | 0.941   |
| Hemoglobin (g/dL)                 | 11.3 [10.2–12.8]     | 11.4 [10.2–12.8]   | 11.2 [10.1–13.1]   | 0.719   |
| Albumin (g/dL)                    | 3.3 [3.0–3.7]        | 3.3 [3.0–3.6]      | 3.3 [3.1–3.7]      | 0.246   |
| Creatinine (mg/dL)                | 1.08 [0.84–1.44]     | 1.08 [0.84–1.47]   | 1.10 [0.86–1.39]   | 0.951   |
| <b>Echocardiographic data</b>     |                      |                    |                    |         |
| LVEF (%)                          | 62 [56–68]           | 62 [56–68]         | 62 [56–68]         | 0.956   |
| LA diameter (mm)                  | 45 [40–50]           | 45 [40–50]         | 45 [40–50]         | 0.581   |
| LVDd (mm)                         | 45 [41–50]           | 45 [41–50]         | 45 [41–49]         | 0.847   |
| LVDs (mm)                         | 29 [26–33]           | 29 [26–33]         | 29 [26–33]         | 0.908   |
| LV mass index (g/m <sup>2</sup> ) | 123 [101–149]        | 121 [100–147]      | 128 [102–155]      | 0.246   |
| RWT                               | 0.48 [0.42–0.57]     | 0.47 [0.41–0.56]   | 0.49 [0.42–0.58]   | 0.307   |
| E/e' (mean)                       | 12.9 [9.9–16.6]      | 12.8 [9.8–16.3]    | 13.0 [10.4–17.4]   | 0.663   |

Data are presented as mean ± SD, %, or median [interquartile range]. BNP, brain natriuretic peptide; BMI, body mass index; CI, confidence interval; E/e', the ratio of early diastolic transmitral flow velocity (E) to early diastolic mitral annular tissue velocity (e'); HF, heart failure; LA, left atrial; LV, left ventricular; LVDd, left ventricular diastolic diameter; LVDs, left ventricular systolic diameter; LVEF, left ventricular ejection fraction; MRA, mineralocorticoid receptor antagonist; NYHA, New York Heart Association; RAS, renin angiotensin system; RWT, relative wall thickness; SGLT2, sodium glucose cotransporter 2.

<https://doi.org/10.1371/journal.pone.0332913.t001>

albumin levels (OR, 0.276; 95% CI, 0.147–0.519;  $p < 0.001$ ), serum creatine levels (OR, 1.406; 95% CI, 1.034–1.910;  $p = 0.030$ ), and left ventricular systolic diameter (OR, 0.590; 95% CI, 0.360–0.969;  $p = 0.037$ ). On multivariable logistic regression analysis, the following variables were selected as the components of the risk score model: age, prior HF admission, serum albumin level, and serum creatinine level (Table 3). Histograms for age, serum albumin, and creatinine levels in the derivation cohort are shown in S1 Fig. The Hosmer–Lemeshow test showed a  $p$ -value  $> 0.05$  in each step, and the compatibility of the multivariable logistic regression model was good. All 278 patients were included in the final multivariable model after multiple imputation. The rate of missing data ranged from 0% to 3.2% across variables. Based on the results, we developed a novel risk score model to predict two-year mortality in patients with HFpEF (ApHAC score):  $\text{exp}(A) / \{1 + \text{exp}(A)\} \times 100$  (%);  $A = -5.114 + 0.083 \times (\text{Age (years)}) + 0.902 \times (\text{prior HF admission}) - 1.122 \times (\text{Albumin (g/dL)}) + 0.399 \times (\text{Creatinine (mg/dL)})$ , (Fig 2). An online calculator was also developed to facilitate estimation of an individual's

**Table 2. Univariable logistic regression analysis predicting death within two years in the derivation cohort.**

| Variable                              | Odds ratio (95% CI)  | p-value |
|---------------------------------------|----------------------|---------|
| Age (per year)                        | 1.088 (1.045–1.132)  | <0.001  |
| Female                                | 0.912 (0.534–1.557)  | 0.736   |
| BMI (per kg/m <sup>2</sup> )          | 0.911 (0.852–0.975)  | 0.007   |
| Systolic blood pressure (per mmHg)    | 0.988 (0.973–1.003)  | 0.116   |
| Diastolic blood pressure (per mmHg)   | 0.987 (0.964–1.011)  | 0.288   |
| NYHA Class III or IV                  | 2.662 (1.392–5.093)  | 0.003   |
| Prior HF admission                    | 2.198 (1.228–3.934)  | 0.008   |
| Diabetes mellitus                     | 0.663 (0.353–1.244)  | 0.201   |
| Atrial fibrillation                   | 0.951 (0.537–1.684)  | 0.863   |
| <b>Medication</b>                     |                      |         |
| RAS inhibitors                        | 1.036 (0.587–1.828)  | 0.903   |
| SGLT2 inhibitors                      | 1.262 (0.377–4.231)  | 0.706   |
| Beta-blockers                         | 0.759 (0.439–1.314)  | 0.325   |
| MRAs                                  | 1.513 (0.884–2.591)  | 0.131   |
| <b>Laboratory data</b>                |                      |         |
| BNP (per pg/mL)                       | 1.000 (1.000–1.001)  | 0.391   |
| Hemoglobin (per g/dL)                 | 0.771 (0.663–0.897)  | <0.001  |
| Albumin (per g/dL)                    | 0.276 (0.147–0.519)  | <0.001  |
| Creatinine (per mg/dL)                | 1.406 (1.034–1.910)  | 0.030   |
| <b>Echocardiographic data</b>         |                      |         |
| LVEF (per %)                          | 1.025 (0.990–1.062)  | 0.159   |
| LA diameter (per mm)                  | 1.253 (0.938–1.672)  | 0.127   |
| LVDd (per mm)                         | 0.717 (0.479–1.073)  | 0.106   |
| LVDs (per mm)                         | 0.590 (0.360–0.969)  | 0.037   |
| LV mass index (per g/m <sup>2</sup> ) | 1.001 (0.994–1.007)  | 0.866   |
| RWT                                   | 5.184 (0.719–37.370) | 0.103   |
| E/e' (mean)                           | 1.001 (0.973–1.030)  | 0.940   |

Abbreviations are as in [Table 1](#).

<https://doi.org/10.1371/journal.pone.0332913.t002>

**Table 3. Multivariable logistic regression model predicting death within two years in the derivation cohort.**

| Variable               | Odds ratio (95% CI) | Coefficient | p-value |
|------------------------|---------------------|-------------|---------|
| Age (per year)         | 1.087 (1.042–1.134) | 0.083       | <0.001  |
| NYHA Class III or IV   | NA                  | NA          | NA      |
| prior HF admission     | 2.464 (1.298–4.677) | 0.902       | 0.006   |
| BNP (pg/ml)            | NA                  | NA          | NA      |
| Hemoglobin (per g/dL)  | NA                  | NA          | NA      |
| Albumin (per g/dL)     | 0.326 (0.161–0.658) | -1.122      | 0.002   |
| Creatinine (per mg/dL) | 1.490 (1.093–2.031) | 0.399       | 0.012   |

Abbreviations are as in [Table 1](#).

<https://doi.org/10.1371/journal.pone.0332913.t003>

**ApHAC score**

$$= \exp(A) / \{1 + \exp(A)\} \times 100 (\%)$$

$$A = -5.114 + 0.083 \times (\text{Age (years)}) + 0.902 \times (\text{prior HF admission}) - 1.122 \times (\text{Albumin (g/dL)}) + 0.399 \times (\text{Creatinine (mg/dL)})$$

**Fig 2. Scheme of the prediction score to estimate the two-year mortality in patients with HFpEF (the ApHAC score).** HF, heart failure; HFpEF, heart failure with preserved ejection fraction.

<https://doi.org/10.1371/journal.pone.0332913.g002>

risk (<https://shinshu-junkanki.jp/aphac-score-calculator/>). The model showed good discrimination, with a c-statistic of 0.764 (S2 Fig). The histogram of the ApHAC score in the derivation cohort is shown in S3 Fig. The model enabled stratification of mortality rates across thirds, and the average predicted versus observed probabilities of death for the low-, intermediate-, and high-risk groups were 8% vs. 9%, 23% vs. 21%, and 46% vs. 49%, respectively (Fig 3A).

**Validation of the derived ApHAC score**

The histogram of the ApHAC score in the validation cohort is shown in S4 Fig. When validated, the ApHAC score showed good discrimination for the primary endpoint (c-statistic=0.764) (S2 Fig). Fig 3B demonstrates the model’s calibration: in the validation cohort, the average predicted versus observed probabilities of death for the low-, intermediate-, and high-risk groups were 7% vs. 9%, 23% vs. 21%, and 51% vs. 44%, respectively.

**Discussion**

This study investigated the predictors of two-year mortality in patients with HFpEF in Japan. We produced a simple risk score model that accurately predicted two-year mortality. All included variables were easily measurable by checking their age, prior HF hospitalization, and blood tests. We believe that this risk score could be useful for bedside determination of whether to consider close follow-up, advanced HF therapies, or palliative care consultations.

To date, numerous risk score models investigating the prognosis of HF have been published [7–10,14,24,25]. Classic models were derived by combining HFrEF and HFpEF, despite their distinct clinical characteristics and features [7,9,10]. Recently, it has been demonstrated that prediction scores designed for HFrEF can be challenging to effectively apply to

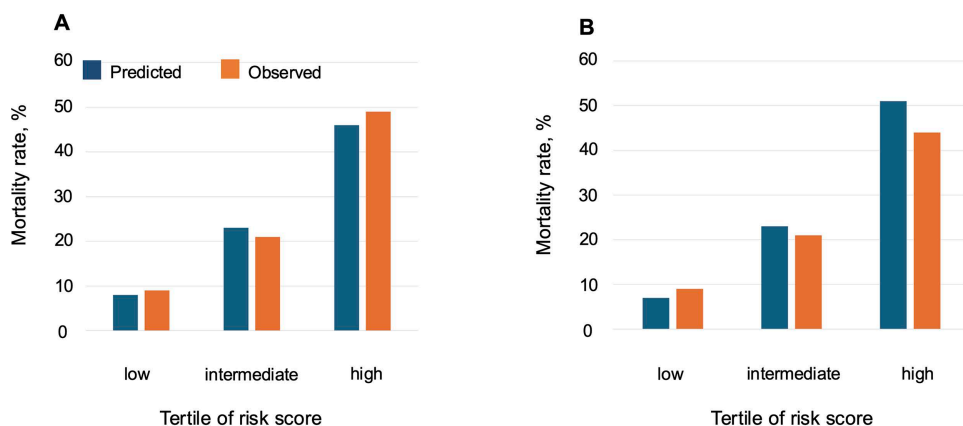

**Fig 3. Calibration plots for the model applied to (A) the derivation cohort and (B) the validation cohort.**

<https://doi.org/10.1371/journal.pone.0332913.g003>

HFpEF [11]. It has been reported that HFpEF and HFrEF differ not only in pathophysiology but also in prognosis, and many previous risk scores have included LVEF itself as a prognostic factor [26]. It has been shown that the HFA-PEFF score, originally used for diagnosing HFpEF [27], is also useful in predicting death and HF readmission in patients with HFpEF [25]. However, this score was originally developed for the purpose of diagnosing HFpEF, requiring detailed echocardiographic data such as global longitudinal strain. Echo stress tests or invasive hemodynamic measurements may also need to be considered. The recently reported risk score model for HFpEF [14] includes patients with an LVEF of 40–49%, which is not classified as HFpEF in the current guidelines [28,29]. HF with mildly reduced ejection fraction (LVEF 41–49%) has been reported to differ from HFpEF in terms of baseline characteristics and underlying pathophysiology [30], and applying this risk score model to HFpEF may result in misclassification or limit its applicability.

In this study, age, history of prior HF admission, serum albumin, and serum creatinine were identified as prognostic factors, all of which have been previously reported as prognostic predictors in past studies [7,14,31]. The results of the present study highlight the importance of nutritional status and cardiorenal syndrome in patients with HFpEF. This study enabled accurate prediction of post-discharge survival rates in HFpEF patients hospitalized for acute HF in Japan. The discriminative ability in the validation cohort was comparable to that in the derivation cohort, and the predictive accuracy remained consistent across patients with both low and high risks. Although NYHA class, BMI, and hemoglobin levels showed significant differences in the univariable logistic regression model, they were not significant in the multivariable logistic model. Regarding NYHA class, 82% of the patients were classified as NYHA I or II after treatment for decompensated HF, and the low number of patients with NYHA III or higher might have influenced the results. With respect to anemia, because it is strongly influenced by age and renal function, particularly in elderly patients, adjustment for these factors may explain why hemoglobin did not remain an independent predictor in this study. In terms of BMI, the relatively low BMI in Japanese patients with HFpEF compared to those in Western countries may have affected the findings. There was no significant difference in BNP levels, an established prognostic predictor of HF, between patients who survived and those who died in the univariable logistic regression analysis. One possible explanation for this result is that BNP levels tend to be lower in HFpEF than in HFrEF patients. The prognostic benefits of angiotensin receptor-neprilysin inhibitor (ARNI) [32] and sodium-glucose cotransporter 2 (SGLT2) inhibitors [15,33], which have been reported to be beneficial in HFpEF, were not observed in this study due to low prescription rates during the enrolment period.

In the present study, we developed a simple risk score model to predict the prognosis of Japanese patients with HFpEF with LVEF  $\geq 50\%$ . The risk score model is a simple tool that can be measured at the bedside and can accurately predicted two-year mortality. We believe that the ApHAC score will be useful to a wide range of healthcare professionals caring for patients with HFpEF. It can be helpful for discussing prognosis with patients and their families, as well as for sharing prognostic information with other healthcare professionals when planning treatment for other conditions, where understanding the expected prognosis might impact therapeutic decisions [34].

This study had several limitations. First, the sample size was small and included only Japanese patients, indicating that Western populations were not evaluated in this study. The performance of our risk score model must be evaluated following their application to people of other ethnicities and countries. Second, this study was performed using data measured at discharge; therefore, application of the model at admission may be limited. However, this investigation aimed to identify patients at high risk of post-discharge mortality; we did not focus on patients who died during hospitalization. Third, although we performed internal validation, further studies are needed to validate the model's accuracy and investigate its predictive ability in other cohorts. Fourth, the prescription rates of ARNI and SGLT2 inhibitors were low owing to the study period. As therapeutic strategies for HFpEF continue to advance, the low usage of these drugs, which are recommended in current guidelines [28,29], raises concerns about the generalizability of this risk score. Finally, this study did not compare the predictive ability of the developed risk score model with previously reported score models.

In conclusion, we developed a simple risk score model for predicting two-year mortality in Japanese patients with HFpEF. All included variables were easily measurable using age, history of prior HF hospitalization, and routine blood

tests. The score model accurately discriminated between patients who survived and those who died within two years after admission for ADHF. This score model may be useful in guiding decisions regarding close follow-up, advanced therapies, or palliative care for these patients. Its generalizability to other populations remains uncertain and requires further investigation.

## Supporting information

**S1 Table. Baseline characteristics in the derivation cohort.** Data are presented as mean  $\pm$  SD, %, or median [interquartile range]. BNP, brain natriuretic peptide; BMI, body mass index; E/e', the ratio of early diastolic transmitral flow velocity (E) to early diastolic mitral annular tissue velocity (e'); HF, heart failure; LA, left atrial; LVDd, left ventricular diastolic diameter; LVDs, left ventricular systolic diameter; LVEF, left ventricular ejection fraction; MRA, mineralocorticoid receptor antagonist; NYHA, New York Heart Association; RAS, renin angiotensin system; RWT, relative wall thickness; SGLT2, sodium glucose cotransporter 2.  
(XLSX)

**S2 Table. Baseline characteristics in the validation cohort.** Abbreviations are as in [S1 Table](#).  
(XLSX)

**S1 Fig. Histograms of (A) age, (B) serum albumin levels, and (C) serum creatinine levels in the derivation cohort.**  
(TIFF)

**S2 Fig. Performance of the derived prediction score (ApHAC score) in (A) the derivation cohort and (B) the validation cohort.**  
(TIFF)

**S3 Fig. Histogram of the ApHAC score in the derivation cohort.**  
(TIFF)

**S4 Fig. Histogram of the ApHAC score in the validation cohort.**  
(TIFF)

**S1 File. Original data.**  
(XLSX)

## Acknowledgments

We thank all of the following 15 hospitals that participated in this study: Aizawa Hospital, Asama Nanroku Komoro Medical Center, Hokushin General Hospital, Iida Municipal Hospital, Ina Central Hospital, Matsumoto Medical Center, Matsushiro General Hospital, Minaminagano Medical Center Shinonoi General Hospital, Nagano Municipal Hospital, Nagano Red Cross Hospital, Okaya City Hospital, Saku Central Hospital, Shinshu Ueda Medical Center, Shinshu University School of Medicine, and Suwa Red Cross Hospital. The authors also acknowledge the secretarial assistance of Minako Aono.

## Author contributions

**Conceptualization:** Takenori Aoki, Sho Suzuki, Masatoshi Minamisawa, Hirohiko Motoki.

**Data curation:** Sho Suzuki, Masatoshi Minamisawa, Yukari Okuma, Kazuhiro Kimura, Yasushi Ueki, Yasutaka Oguchi, Tamon Kato, Tatsuya Saigusa, Soichiro Ebisawa, Ayako Okada, Hirohiko Motoki.

**Formal analysis:** Takenori Aoki, Sho Suzuki.

**Investigation:** Takenori Aoki.

**Methodology:** Takenori Aoki, Sho Suzuki.

**Project administration:** Hirohiko Motoki.

**Resources:** Hirohiko Motoki.

**Supervision:** Masatoshi Minamisawa, Koji Yoshie, Ken Nishikawa, Yukari Okuma, Kazuhiro Kimura, Yasushi Ueki, Yasutaka Oguchi, Tamon Kato, Tatsuya Saigusa, Soichiro Ebisawa, Ayako Okada, Hirohiko Motoki, Koichiro Kuwahara.

**Visualization:** Takenori Aoki, Sho Suzuki.

**Writing – original draft:** Takenori Aoki, Sho Suzuki.

**Writing – review & editing:** Sho Suzuki, Masatoshi Minamisawa, Koji Yoshie, Ken Nishikawa, Yukari Okuma, Kazuhiro Kimura, Yasushi Ueki, Yasutaka Oguchi, Tamon Kato, Tatsuya Saigusa, Soichiro Ebisawa, Ayako Okada, Hirohiko Motoki, Koichiro Kuwahara.

## References

1. Cannata A, McDonagh TA. Heart failure with preserved ejection fraction. *N Engl J Med*. 2025;392(2):173–84. <https://doi.org/10.1056/nejmcp2305181>
2. Teramoto K, Teng T-HK, Chandramouli C, Tromp J, Sakata Y, Lam CS. Epidemiology and clinical features of heart failure with preserved ejection fraction. *Card Fail Rev*. 2022;8:e27. <https://doi.org/10.15420/cfr.2022.06> PMID: 35991117
3. Dunlay SM, Roger VL, Redfield MM. Epidemiology of heart failure with preserved ejection fraction. *Nat Rev Cardiol*. 2017;14(10):591–602. <https://doi.org/10.1038/nrcardio.2017.65> PMID: 28492288
4. Bozkurt B, Ahmad T, Alexander K, Baker WL, Bosak K, Breathett K, et al. HF STATS 2024: Heart Failure Epidemiology and Outcomes Statistics An Updated 2024 Report from the Heart Failure Society of America. *J Card Fail*. 2025;31(1):66–116. <https://doi.org/10.1016/j.cardfail.2024.07.001> PMID: 39322534
5. Taylor CJ, Ordóñez-Mena JM, Roalfe AK, Lay-Flurrie S, Jones NR, Marshall T, et al. Trends in survival after a diagnosis of heart failure in the United Kingdom 2000-2017: population based cohort study. *BMJ*. 2019;364:l223. <https://doi.org/10.1136/bmj.l223> PMID: 30760447
6. Shiraishi Y, Kohsaka S, Sato N, Takano T, Kitai T, Yoshikawa T, et al. 9-year trend in the management of acute heart failure in Japan: a report from the National Consortium of Acute Heart Failure Registries. *J Am Heart Assoc*. 2018;7:e008687. <https://doi.org/10.1161/jaha.118.008687>
7. Levy WC, Mozaffarian D, Linker DT, Sutradhar SC, Anker SD, Cropp AB, et al. The seattle heart failure model: prediction of survival in heart failure. *Circulation*. 2006;113(11):1424–33. <https://doi.org/10.1161/CIRCULATIONAHA.105.584102> PMID: 16534009
8. Rahimi K, Bennett D, Conrad N, Williams TM, Basu J, Dwight J, et al. Risk prediction in patients with heart failure: a systematic review and analysis. *JACC Heart Fail* 2014;2:440–6. <https://doi.org/10.1016/j.jchf.2014.04.008>
9. Peterson PN, Rumsfeld JS, Liang L, Albert NM, Hernandez AF, Peterson ED, et al. A validated risk score for in-hospital mortality in patients with heart failure from the American Heart Association get with the guidelines program. *Circ Cardiovasc Qual Outcomes*. 2010;3(1):25–32. <https://doi.org/10.1161/CIRCOUTCOMES.109.854877> PMID: 20123668
10. Fonarow GC, Adams KF Jr, Abraham WT, Yancy CW, Boscardin WJ, ADHERE Scientific Advisory Committee, Study Group, and Investigators. Risk stratification for in-hospital mortality in acutely decompensated heart failure: classification and regression tree analysis. *JAMA*. 2005;293(5):572–80. <https://doi.org/10.1001/jama.293.5.572> PMID: 15687312
11. Shiraishi Y, Kohsaka S, Nagai T, Goda A, Mizuno A, Nagatomo Y, et al. Validation and recalibration of seattle heart failure model in japanese acute heart failure patients. *J Card Fail*. 2019;25(7):561–7. <https://doi.org/10.1016/j.cardfail.2018.07.463> PMID: 30099192
12. Treeware S, Kulthamrongsri N, Owattanapanich W, Krittayaphong R. Is it time for class I recommendation for sodium-glucose cotransporter-2 inhibitors in heart failure with mildly reduced or preserved ejection fraction?: An updated systematic review and meta-analysis. *Front Cardiovasc Med*. 2023;10:1046194. <https://doi.org/10.3389/fcvm.2023.1046194> PMID: 36824458
13. Obokata M, Sorimachi H, Harada T, Kagami K, Saito Y, Ishii H. Epidemiology, pathophysiology, diagnosis, and therapy of heart failure with preserved ejection fraction in Japan. *J Card Fail*. 2023;29(3):375–88. <https://doi.org/10.1016/j.cardfail.2022.09.018> PMID: 37162126
14. McDowell K, Kondo T, Talebi A, Teh K, Bachus E, de Boer RA, et al. Prognostic models for mortality and morbidity in heart failure with preserved ejection fraction. *JAMA Cardiol*. 2024;9(5):457. <https://doi.org/10.1001/jamacardio.2024.0284>
15. Solomon SD, McMurray JJV, Claggett B, de Boer RA, DeMets D, Hernandez AF, et al. Dapagliflozin in heart failure with mildly reduced or preserved ejection fraction. *N Engl J Med*. 2022;387(12):1089–98. <https://doi.org/10.1056/NEJMoa2206286> PMID: 36027570
16. Solomon SD, McMurray JJV, Anand IS, Ge J, Lam CSP, Maggioni AP, et al. Angiotensin-neprilysin inhibition in heart failure with preserved ejection fraction. *N Engl J Med*. 2019;381(17):1609–20. <https://doi.org/10.1056/NEJMoa1908655> PMID: 31475794
17. Massie BM, Carson PE, McMurray JJ, Komajda M, McKelvie R, Zile MR, et al. Irbesartan in patients with heart failure and preserved ejection fraction. *N Engl J Med*. 2008;359(23):2456–67. <https://doi.org/10.1056/NEJMoa0805450> PMID: 19001508

18. Kanzaki Y, Minamisawa M, Motoki H, Suzuki S, Okuma Y, Kanai M, et al. Prognostic impact of the ratio of hemoglobin to red blood cell distribution width in patients after acute decompensated heart failure. *Intern Med.* 2025;64(6):807–16. <https://doi.org/10.2169/internalmedicine.3691-24> PMID: [39135256](https://pubmed.ncbi.nlm.nih.gov/39135256/)
19. McKee PA, Castelli WP, McNamara PM, Kannel WB. The natural history of congestive heart failure: the Framingham study. *N Engl J Med.* 1971;285(26):1441–6. <https://doi.org/10.1056/NEJM197111232852601> PMID: [5122894](https://pubmed.ncbi.nlm.nih.gov/5122894/)
20. Suzuki S, Motoki H, Kanzaki Y, Maruyama T, Hashizume N, Kozuka A, et al. Prognostic impact of mineralocorticoid receptor antagonist in patients with heart failure with preserved ejection fraction. *ESC Heart Fail.* 2020;7(5):2752–61. <https://doi.org/10.1002/ehf2.12867> PMID: [32592265](https://pubmed.ncbi.nlm.nih.gov/32592265/)
21. van Buuren S. Flexible imputation of missing data. 2nd ed. Boca Raton: CRC Press; 2018.
22. Rubin DB. Multiple imputation for nonresponse in surveys. New York: John Wiley & Sons; 1987.
23. Janssen KJM, Donders ART, Harrell FE Jr, Vergouwe Y, Chen Q, Grobbee DE, et al. Missing covariate data in medical research: to impute is better than to ignore. *J Clin Epidemiol.* 2010;63(7):721–7. <https://doi.org/10.1016/j.jclinepi.2009.12.008> PMID: [20338724](https://pubmed.ncbi.nlm.nih.gov/20338724/)
24. Suzuki S, Motoki H, Kanzaki Y, Maruyama T, Hashizume N, Kozuka A, et al. A predictive model for 6-month mortality in elderly patients with heart failure. *Int Heart J.* 2020;61(2):325–31. <https://doi.org/10.1536/ihj.19-572>
25. Sotomi Y, Iwakura K, Hikoso S, Inoue K, Onishi T, Okada M, et al. Prognostic significance of the HFA-PEFF score in patients with heart failure with preserved ejection fraction. *ESC Heart Fail.* 2021;8(3):2154–64. <https://doi.org/10.1002/ehf2.13302> PMID: [33760383](https://pubmed.ncbi.nlm.nih.gov/33760383/)
26. Meta-analysis Global Group in Chronic Heart Failure (MAGGIC). The survival of patients with heart failure with preserved or reduced left ventricular ejection fraction: an individual patient data meta-analysis. *Eur Heart J.* 2012;33(14):1750–7. <https://doi.org/10.1093/eurheartj/ehr254> PMID: [21821849](https://pubmed.ncbi.nlm.nih.gov/21821849/)
27. Pieske B, Tschöpe C, de Boer RA, Fraser AG, Anker SD, Donal E, et al. How to diagnose heart failure with preserved ejection fraction: the HFA-PEFF diagnostic algorithm: a consensus recommendation from the Heart Failure Association (HFA) of the European Society of Cardiology (ESC). *Eur Heart J.* 2019;40(40):3297–317. <https://doi.org/10.1093/eurheartj/ehz641> PMID: [31504452](https://pubmed.ncbi.nlm.nih.gov/31504452/)
28. McDonagh TA, Metra M, Adamo M, Gardner RS, Baumbach A, Böhm M, et al. 2021 ESC Guidelines for the diagnosis and treatment of acute and chronic heart failure. *Eur Heart J.* 2021;42(36):3599–726. <https://doi.org/10.1093/eurheartj/ehab368> PMID: [34447992](https://pubmed.ncbi.nlm.nih.gov/34447992/)
29. Heidenreich PA, Bozkurt B, Aguilar D, Allen LA, Byun JJ, Colvin MM, et al. 2022 AHA/ACC/HFSA Guideline for the Management of Heart Failure: A Report of the American College of Cardiology/American Heart Association Joint Committee on Clinical Practice Guidelines. *Circulation.* 2022;145(18):e895–1032. <https://doi.org/10.1161/CIR.0000000000001063> PMID: [35363499](https://pubmed.ncbi.nlm.nih.gov/35363499/)
30. Savarese G, Stolfo D, Sinagra G, Lund LH. Heart failure with mid-range or mildly reduced ejection fraction. *Nat Rev Cardiol.* 2021;19(2):100–16. <https://doi.org/10.1038/s41569-021-00605-5>
31. Shiraishi Y, Kohsaka S, Abe T, Nagai T, Goda A, Nishihata Y, et al. Derivation and validation of clinical prediction models for rapid risk stratification for time-sensitive management for acute heart failure. *J Clin Med.* 2020;9(11):3394. <https://doi.org/10.3390/jcm9113394> PMID: [33113911](https://pubmed.ncbi.nlm.nih.gov/33113911/)
32. Solomon SD, Vaduganathan M, L Claggett B, Packer M, Zile M, Swedberg K, et al. Sacubitril/valsartan across the spectrum of ejection fraction in heart failure. *Circulation.* 2020;141(5):352–61. <https://doi.org/10.1161/CIRCULATIONAHA.119.044586> PMID: [31736342](https://pubmed.ncbi.nlm.nih.gov/31736342/)
33. Anker SD, Butler J, Filippatos G, Ferreira JP, Bocchi E, Böhm M, et al. Empagliflozin in heart failure with a preserved ejection fraction. *N Engl J Med.* 2021;385(16):1451–61. <https://doi.org/10.1056/NEJMoa2107038> PMID: [34449189](https://pubmed.ncbi.nlm.nih.gov/34449189/)
34. Aaronson KD, Cowger J. Heart failure prognostic models: why bother? *Circ Heart Fail.* 2012;5(1):6–9. <https://doi.org/10.1161/CIRCHEARTFAILURE.111.965848> PMID: [22253406](https://pubmed.ncbi.nlm.nih.gov/22253406/)
